# Supplementary material for: The WWOX Gene Influences Cellular Pathways in the Neuronal Differentiation of Human Neural Progenitor Cells
Source: Front Cell Neurosci. 2019 Aug 30;13:391. doi: 10.3389/fncel.2019.00391 (PMC6730490; doi:10.3389/fncel.2019.00391)
Supplement: Supplementary file 1 [file Data_Sheet_1.pdf]

## Supplementary Material

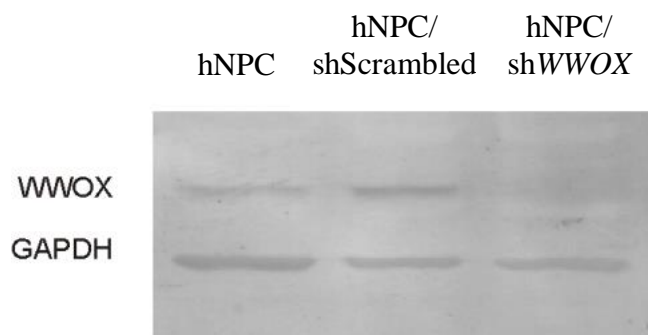

**Supplementary Figure 1.** Western Blot verification of *WWOX* gene silencing. From left: native hNPC, hNPC/shScrambled control and hNPC/*shWWOX* silenced variant.

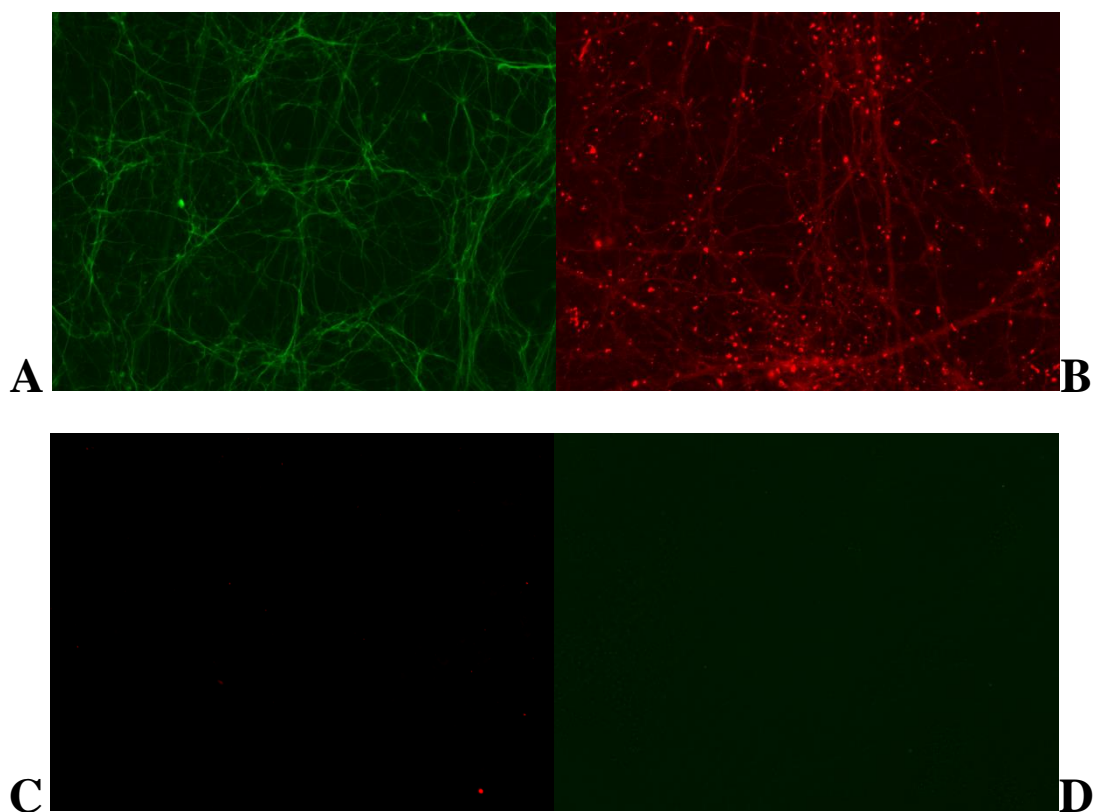

**Supplementary Figure 2.** Immunocytochemistry staining of spontaneously differentiated human neural progenitor cells (H9 derived) with cell-type specific markers. Neuronal markers MAP2 and TUJ (A, B), astrocyte marker GFAP (C) and oligodendrocyte marker GalC (D).

**Supplementary Figures 3-5** available as separate **pdf** files, for the reason of maintaining high quality graphics.

**Supplementary Table 1.** The selected genes with high contribution to spatial partitioning of the hNPC/shScrambled, hNPC/shWWOX, neurons/shScrambled and neurons/shWWOX genotypes in the principal component analysis (PCA) with an oxidative stress response/antioxidant defense gene set. Protein function descriptions according to GeneCards®: The Human Gene Database.

| Gene   | Contribution | Protein name                                | Function of encoded protein                                                                                                                                                                                                                                                                                                                                                                                                      |
|--------|--------------|---------------------------------------------|----------------------------------------------------------------------------------------------------------------------------------------------------------------------------------------------------------------------------------------------------------------------------------------------------------------------------------------------------------------------------------------------------------------------------------|
| SPR    | 1.176        | Sepiapterin Reductase                       | This gene encodes an aldo-keto reductase that catalyzes the NADPH-dependent reduction of pteridine derivatives and is important in the biosynthesis of tetrahydrobiopterin (BH <sub>4</sub> ). Among its related pathways are eNOS activation and regulation and Folate biosynthesis. Gene Ontology (GO) annotations related to this gene include oxidoreductase activity and aldo-keto reductase (NADP) activity.               |
| PXDN   | 0.976        | Peroxidasin                                 | Displays low peroxidase activity and is likely to participate in H <sub>2</sub> O <sub>2</sub> metabolism and peroxidative reactions in the cardiovascular system. Plays a role in extracellular matrix formation.                                                                                                                                                                                                               |
| ADCY3  | 0.914        | Adenylate Cyclase 3                         | Catalyzes the formation of the signaling molecule cAMP in response to G-protein signaling. Participates in signaling cascades triggered by odorant receptors via its function in cAMP biosynthesis.                                                                                                                                                                                                                              |
| NFE2L2 | 0.821        | Nuclear Factor, Erythroid 2 Like 2          | Transcription activator that binds to antioxidant response (ARE) elements in the promoter regions of target genes. Important for the coordinated up-regulation of genes in response to oxidative stress and the regulation of cellular redox conditions.                                                                                                                                                                         |
| CHD6   | 0.782        | Chromodomain Helicase DNA Binding Protein 6 | DNA-dependent ATPase that plays a role in chromatin remodeling. Activates transcription of specific genes in response to oxidative stress through interaction with NFE2L2.                                                                                                                                                                                                                                                       |
| SRXN1  | 0.781        | Sulfiredoxin 1                              | Contributes to oxidative stress resistance by reducing cysteine-sulfinic acid formed under exposure to oxidants in the peroxiredoxins PRDX1, PRDX2, PRDX3 and PRDX4. Does not act on PRDX5 or PRDX6. May catalyze the reduction in a multi-step process by acting both as a specific phosphotransferase and a thioltransferase.                                                                                                  |
| PDK1   | 0.726        | Pyruvate Dehydrogenase Kinase 1             | Pyruvate dehydrogenase (PDH) is a mitochondrial multienzyme complex that catalyzes the oxidative decarboxylation of pyruvate and is one of the major enzymes responsible for the regulation of homeostasis of carbohydrate fuels in mammals. The enzymatic activity is regulated by a phosphorylation/dephosphorylation cycle. Phosphorylation of PDH by a specific pyruvate dehydrogenase kinase (PDK) results in inactivation. |
| SEPX1  | 0.691        | Methionine Sulfoxide Reductase B1           | Members of this family function as repair enzymes that protect proteins from oxidative stress by catalyzing the reduction of methionine-R-sulfoxides to methionines.                                                                                                                                                                                                                                                             |
| G6PD   | 0.677        | Glucose-6-Phosphate Dehydrogenase           | This protein is a cytosolic enzyme encoded by a housekeeping X-linked gene whose main function is to produce NADPH, a key electron donor in the defense against oxidizing agents and in reductive biosynthetic reactions.                                                                                                                                                                                                        |
| CYCS   | 0.664        | Cytochrome C, Somatic                       | This gene encodes a small heme protein that functions as a central component of the electron transport chain in mitochondria. The encoded protein associates with the inner membrane of the mitochondrion where it accepts electrons from cytochrome b and transfers them to the cytochrome oxidase complex.                                                                                                                     |

|         |       |                                              |                                                                                                                                                                                                                                                                                                                                                                                                                  |
|---------|-------|----------------------------------------------|------------------------------------------------------------------------------------------------------------------------------------------------------------------------------------------------------------------------------------------------------------------------------------------------------------------------------------------------------------------------------------------------------------------|
| UCP2    | 0.658 | Uncoupling Protein 2                         | Reduce the mitochondrial membrane potential in mammalian cells. UCP are mitochondrial transporter proteins that create proton leaks across the inner mitochondrial membrane, thus uncoupling oxidative phosphorylation from ATP synthesis. As a result, energy is dissipated in the form of heat.                                                                                                                |
| TXNIP   | 0.633 | Thioredoxin Interacting Protein              | This protein inhibits the antioxidative function of thioredoxin resulting in the accumulation of reactive oxygen species and cellular stress. This protein also functions as a regulator of cellular metabolism and of endoplasmic reticulum (ER) stress. May act as an oxidative stress mediator by inhibiting thioredoxin activity or by limiting its bioavailability.                                         |
| FXN     | 0.631 | Frataxin                                     | The protein functions in regulating mitochondrial iron transport and respiration. May play a role in the protection against iron-catalyzed oxidative stress through its ability to catalyze the oxidation of Fe(2+) to Fe(3+);                                                                                                                                                                                   |
| ARG2    | 0.599 | Arginase 2                                   | May play a role in the regulation of extra-urea cycle arginine metabolism and also in down-regulation of nitric oxide synthesis.                                                                                                                                                                                                                                                                                 |
| GCLM    | 0.589 | Glutamate-Cysteine Ligase Regulatory Protein | The first rate limiting enzyme of glutathione synthesis.                                                                                                                                                                                                                                                                                                                                                         |
| ALDH3A2 | 0.574 | Aldehyde Dehydrogenase 3 Family Member A2    | Catalyzes the oxidation of long-chain aliphatic aldehydes to fatty acids.                                                                                                                                                                                                                                                                                                                                        |
| MSRB3   | 0.561 | Methionine Sulfoxide Reductase B3            | The protein encoded by this gene catalyzes the reduction of methionine sulfoxide to methionine.                                                                                                                                                                                                                                                                                                                  |
| NDUFS4  | 0.555 | Mitochondrial Respiratory Chain Complex I    | Accessory subunit of the mitochondrial membrane respiratory chain NADH dehydrogenase (Complex I), that is believed not to be involved in catalysis. Complex I functions in the transfer of electrons from NADH to the respiratory chain.                                                                                                                                                                         |
| FDXR    | 0.543 | Ferredoxin Reductase                         | This gene encodes a mitochondrial flavoprotein that initiates electron transport for cytochromes P450 receiving electrons from NADPH.                                                                                                                                                                                                                                                                            |
| LDHA    | 0.498 | Lactate Dehydrogenase A                      | It catalyzes the conversion of pyruvate to lactate under anaerobic conditions and is key in the altered glycolytic metabolism that is a feature of cancer cells.                                                                                                                                                                                                                                                 |
| CYBA    | 0.468 | Cytochrome B-245 Alpha Chain                 | Cytochrome b is comprised of a light chain (alpha) and a heavy chain (beta). This gene encodes the light, alpha subunit which has been proposed as a primary component of the microbicidal oxidase system of phagocytes. Critical component of the membrane-bound oxidase of phagocytes that generates superoxide. Associates with NOX3 to form a functional NADPH oxidase constitutively generating superoxide. |
| GSK3B   | 0.435 | Glycogen Synthase Kinase 3 Beta              | The protein encoded by this gene is a serine-threonine kinase belonging to the glycogen synthase kinase subfamily. It is a negative regulator of glucose homeostasis and is involved in energy metabolism, inflammation, ER-stress, mitochondrial dysfunction, and apoptotic pathways.                                                                                                                           |
| DDAH1   | 0.398 | Dimethylarginine Dimethylaminohydrolase 1    | Hydrolyzes N(G),N(G)-dimethyl-L-arginine (ADMA) and N(G)-monomethyl-L-arginine (MMA) which act as inhibitors of NOS. Has therefore a role in the regulation of nitric oxide generation.                                                                                                                                                                                                                          |

|          |       |                                                    |                                                                                                                                                                                                                                                                                                                                                                                                                                                                                                        |
|----------|-------|----------------------------------------------------|--------------------------------------------------------------------------------------------------------------------------------------------------------------------------------------------------------------------------------------------------------------------------------------------------------------------------------------------------------------------------------------------------------------------------------------------------------------------------------------------------------|
| DDAH2    | 0.370 | Dimethylarginine<br>Dimethylaminohydrolase<br>2    | The encoded enzyme functions in nitric oxide generation by regulating the cellular concentrations of methylarginines, which in turn inhibit nitric oxide synthase activity. The protein may be localized to the mitochondria.                                                                                                                                                                                                                                                                          |
| CYB5R4   | 0.307 | Cytochrome B5 Reductase<br>4                       | NADH-cytochrome b5 reductase involved in endoplasmic reticulum stress response pathway. Plays a critical role in protecting pancreatic beta-cells against oxidant stress, possibly by protecting the cell from excess buildup of reactive oxygen species (ROS). Reduces a variety of substrates in vitro, such as cytochrome c, ferricyanide and methemoglobin.                                                                                                                                        |
| GUCY1B3  | 0.252 | Guanylate Cyclase 1<br>Soluble Subunit Beta 1      | Mediates responses to nitric oxide (NO) by catalyzing the biosynthesis of the signaling molecule cGMP.                                                                                                                                                                                                                                                                                                                                                                                                 |
| SOD2     | 0.239 | Superoxide Dismutase 2                             | Destroys superoxide anion radicals which are normally produced within the cells and which are toxic to biological systems.                                                                                                                                                                                                                                                                                                                                                                             |
| PFKP     | 0.200 | Phosphofructokinase,<br>Platelet                   | Catalyzes the phosphorylation of D-fructose 6-phosphate to fructose 1,6-bisphosphate by ATP, the first committing step of glycolysis                                                                                                                                                                                                                                                                                                                                                                   |
| HK2      | 0.144 | Hexokinase 2                                       | Hexokinases phosphorylate glucose to produce glucose-6-phosphate, the first step in most glucose metabolism pathways. This gene encodes hexokinase 2, the predominant form found in skeletal muscle. It localizes to the outer membrane of mitochondria.                                                                                                                                                                                                                                               |
| SLC25A24 | 0.127 | Solute Carrier Family 25<br>Member 24              | Calcium-dependent mitochondrial solute carrier. Mediates the reversible, electroneutral exchange of Mg-ATP or Mg-ADP against phosphate ions, catalyzing the net uptake or efflux of adenine nucleotides across the mitochondrial inner membrane. May play a role in protecting cells against oxidative stress-induced cell death, probably by promoting the formation of calcium-phosphate precipitates in the mitochondrial matrix, and thereby buffering calcium levels in the mitochondrial matrix. |
| ROMO1    | 0.120 | Reactive Oxygen Species<br>Modulator 1             | Induces production of reactive oxygen species (ROS) which are necessary for cell proliferation. May play a role in inducing oxidative DNA damage and replicative senescence. May play a role in the coordination of mitochondrial morphology and cell proliferation.                                                                                                                                                                                                                                   |
| IDH1     | 0.095 | Isocitrate Dehydrogenase<br>(NADP(+)) 1, Cytosolic | Isocitrate dehydrogenases catalyze the oxidative decarboxylation of isocitrate to 2-oxoglutarate. The cytoplasmic enzyme serves a significant role in cytoplasmic NADPH production.                                                                                                                                                                                                                                                                                                                    |
| SOD1     | 0.092 | Superoxide Dismutase 1                             | Destroys radicals which are normally produced within the cells and which are toxic to biological systems.                                                                                                                                                                                                                                                                                                                                                                                              |
| PRDX2    | 0.084 | Peroxiredoxin 2                                    | Thiol-specific peroxidase that catalyzes the reduction of hydrogen peroxide and organic hydroperoxides to water and alcohols, respectively. Plays a role in cell protection against oxidative stress by detoxifying peroxides and as sensor of hydrogen peroxide-mediated signaling events.                                                                                                                                                                                                            |
| HIF1A    | 0.033 | Hypoxia Inducible Factor<br>1 Subunit Alpha        | HIF-1 functions as a master regulator of cellular and systemic homeostatic response to hypoxia by activating transcription of many genes, including those involved in energy metabolism, angiogenesis, apoptosis, and other genes whose protein products increase oxygen delivery or facilitate metabolic adaptation to hypoxia.                                                                                                                                                                       |

**Supplementary Table 2** GSEA report. Enrichment in phenotype hNPC\_WWOX\_high.

| Gene set name                                                      | SIZE | Enrichment score | FDR q-val |
|--------------------------------------------------------------------|------|------------------|-----------|
| GO_NEURAL_CREST_CELL_DIFFERENTIATION                               | 33   | 0.622            | 0.000     |
| GO_NEURAL_CREST_CELL_MIGRATION                                     | 21   | 0.677            | 0.003     |
| GO_HOMOPHILIC_CELL_ADHESION_VIA_PLASMA_MEMBRANE_ADHESION_MOLECULES | 53   | 0.511            | 0.007     |
| GO_CELL_CELL_ADHESION_VIA_PLASMA_MEMBRANE_ADHESION_MOLECULES       | 69   | 0.428            | 0.101     |
| GO_NEGATIVE_REGULATION_OF_AXON_EXTENSION                           | 21   | 0.578            | 0.089     |
| GO_AORTA_DEVELOPMENT                                               | 24   | 0.547            | 0.078     |
| GO_PHOTORECEPTOR_CELL_MAINTENANCE                                  | 15   | 0.607            | 0.080     |
| GO_DENDRITE_MORPHOGENESIS                                          | 30   | 0.525            | 0.072     |
| GO_EMBRYONIC_PATTERN_SPECIFICATION                                 | 24   | 0.533            | 0.065     |
| GO_REGULATION_OF_NEUROTRANSMITTER_TRANSPORT                        | 27   | 0.518            | 0.086     |
| GO_PROTEIN_LIPID_COMPLEX_SUBUNIT_ORGANIZATION                      | 16   | 0.592            | 0.099     |
| GO_REGULATION_OF_NEUROTRANSMITTER_SECRETION                        | 23   | 0.521            | 0.115     |
| GO_SEGMENTATION                                                    | 46   | 0.425            | 0.111     |
| GO_TISSUE_REMODELING                                               | 38   | 0.449            | 0.115     |
| GO_REGULATION_OF_NEURON_MIGRATION                                  | 17   | 0.555            | 0.114     |
| GO_RETINA_HOMEOSTASIS                                              | 23   | 0.503            | 0.160     |
| GO_NEURON_RECOGNITION                                              | 20   | 0.507            | 0.183     |
| GO_POSITIVE_REGULATION_OF_LIPID_TRANSPORT                          | 15   | 0.555            | 0.190     |
| GO_STEM_CELL_DIFFERENTIATION                                       | 80   | 0.360            | 0.203     |
| GO_MESENCHYMAL_CELL_DIFFERENTIATION                                | 60   | 0.391            | 0.198     |
| GO_REGULATION_OF_PLASMA_LIPOPROTEIN_PARTICLE_LEVELS                | 21   | 0.494            | 0.213     |
| GO_ENDOCHONDRAL_BONE_MORPHOGENESIS                                 | 18   | 0.498            | 0.221     |
| GO_REGULATION_OF_CARTILAGE_DEVELOPMENT                             | 24   | 0.471            | 0.213     |
| GO_NEGATIVE_REGULATION_OF_NEURON_DIFFERENTIATION                   | 98   | 0.344            | 0.212     |
| GO_RESPIRATORY_GASEOUS_EXCHANGE                                    | 23   | 0.460            | 0.204     |
| GO_COLUMNAR_CUBOIDAL_EPITHELIAL_CELL_DEVELOPMENT                   | 19   | 0.486            | 0.208     |
| GO_CARDIAC_SEPTUM_DEVELOPMENT                                      | 52   | 0.376            | 0.218     |
| GO_NEGATIVE_CHEMOTAXIS                                             | 22   | 0.464            | 0.231     |
| GO_SOMITOGENESIS                                                   | 34   | 0.422            | 0.227     |
| GO_ARTERY_MORPHOGENESIS                                            | 22   | 0.476            | 0.229     |
| GO_REGULATION_OF_PHOSPHOLIPASE_ACTIVITY                            | 18   | 0.497            | 0.222     |
| GO_NEGATIVE_REGULATION_OF_STEM_CELL_DIFFERENTIATION                | 22   | 0.470            | 0.224     |
| GO_NEGATIVE_REGULATION_OF_NERVOUS_SYSTEM_DEVELOPMENT               | 143  | 0.305            | 0.222     |
| GO_MESENCHYME_DEVELOPMENT                                          | 82   | 0.347            | 0.216     |
| GO_NEGATIVE_REGULATION_OF_WOUND_HEALING                            | 17   | 0.486            | 0.223     |
| GO_REGULATION_OF_AXON_GUIDANCE                                     | 18   | 0.480            | 0.220     |
| GO_REGULATION_OF_CHONDROCYTE_DIFFERENTIATION                       | 21   | 0.470            | 0.223     |
| GO_REGULATION_OF_EXTENT_OF_CELL_GROWTH                             | 59   | 0.369            | 0.228     |
| GO_REGULATION_OF_NEURAL_PRECURSOR_CELL_PROLIFERATION               | 36   | 0.396            | 0.236     |
| GO_ARTERY_DEVELOPMENT                                              | 38   | 0.389            | 0.242     |
| GO_NEURONAL_STEM_CELL_POPULATION_MAINTENANCE                       | 16   | 0.495            | 0.238     |
| GO_SEMAPHORIN_PLEXIN_SIGNALING_PATHWAY                             | 22   | 0.458            | 0.233     |
| GO_DENDRITE_DEVELOPMENT                                            | 53   | 0.366            | 0.231     |
| GO_REGULATION_OF_AXONOGENESIS                                      | 92   | 0.322            | 0.234     |

**Supplementary Table 3** GSEA report. Enrichment in phenotype hNPC\_WWOX\_del.

## Supplementary Material

| Gene set name                                                                           | Size | Enrichment Score | FDR q-val |
|-----------------------------------------------------------------------------------------|------|------------------|-----------|
| GO_RESPONSE_TO_ZINC_ION                                                                 | 20   | -0.703           | 0.029     |
| GO_MATURATION_OF_SSU_RRNA                                                               | 37   | -0.603           | 0.051     |
| GO_NEGATIVE_REGULATION_OF_MYELOID_LEUKOCYTE_DIFFERENTIATION                             | 17   | -0.686           | 0.079     |
| GO_RRNA_TRANSCRIPTION                                                                   | 15   | -0.698           | 0.080     |
| GO_TRNA_METABOLIC_PROCESS                                                               | 137  | -0.463           | 0.068     |
| GO_ALPHA_AMINO_ACID_BIOSYNTHETIC_PROCESS                                                | 48   | -0.549           | 0.065     |
| GO_MATURATION_OF_SSU_RRNA_FROM_TRICISTRONIC_RRNA_TRANSCRIPT_SSU_RRNA_5_8S_RRNA_LSU_RRNA | 30   | -0.593           | 0.057     |
| GO_RIBOSOME_BIOGENESIS                                                                  | 266  | -0.429           | 0.055     |
| GO_NUCLEAR_EXPORT                                                                       | 127  | -0.459           | 0.075     |
| GO_TETRAPYRROLE_METABOLIC_PROCESS                                                       | 35   | -0.556           | 0.093     |
| GO_ANTIGEN_PROCESSING_AND_PRESENTATION_OF_EXOGENOUS_PEPTIDE_ANTIGEN_VIA_MHC_CLASS_I     | 49   | -0.513           | 0.093     |
| GO_NEGATIVE_REGULATION_OF_MYELOID_CELL_DIFFERENTIATION                                  | 34   | -0.559           | 0.093     |
| GO_ACUTE_INFLAMMATORY_RESPONSE                                                          | 19   | -0.628           | 0.099     |
| GO_WATER_SOLUBLE_VITAMIN_METABOLIC_PROCESS                                              | 48   | -0.511           | 0.103     |
| GO_RIBOSOMAL_SMALL_SUBUNIT_BIOGENESIS                                                   | 52   | -0.500           | 0.102     |
| GO_OLIGOSACCHARIDE_LIPID_INTERMEDIATE_BIOSYNTHETIC_PROCESS                              | 18   | -0.630           | 0.096     |
| GO_REGULATION_OF_ERAD_PATHWAY                                                           | 22   | -0.597           | 0.091     |
| GO_INTRASPECIES_INTERACTION_BETWEEN_ORGANISMS                                           | 19   | -0.627           | 0.095     |
| GO_SERINE_FAMILY_AMINO_ACID_METABOLIC_PROCESS                                           | 26   | -0.576           | 0.098     |
| GO_ANTIGEN_PROCESSING_AND_PRESENTATION_OF_PEPTIDE_ANTIGEN_VIA_MHC_CLASS_I               | 63   | -0.483           | 0.103     |
| GO_NCRNA_METABOLIC_PROCESS                                                              | 430  | -0.395           | 0.116     |
| GO_RIBONUCLEOPROTEIN_COMPLEX_BIOGENESIS                                                 | 373  | -0.398           | 0.115     |
| GO_MESENCHYME_MORPHOGENESIS                                                             | 18   | -0.615           | 0.112     |
| GO_RIBONUCLEOPROTEIN_COMPLEX_LOCALIZATION                                               | 104  | -0.440           | 0.108     |
| GO_TRNA_PROCESSING                                                                      | 85   | -0.457           | 0.113     |
| GO_REGULATION_OF_RECEPTOR_INTERNALIZATION                                               | 18   | -0.614           | 0.112     |
| GO_REGULATION_OF_INTERFERON_BETA_PRODUCTION                                             | 22   | -0.582           | 0.110     |
| GO_MITOCHONDRIAL_RNA_METABOLIC_PROCESS                                                  | 22   | -0.586           | 0.110     |
| GO_REGULATION_OF_CELLULAR_RESPONSE_TO_HEAT                                              | 58   | -0.476           | 0.111     |
| GO_MITOCHONDRIAL_TRANSLATION                                                            | 98   | -0.437           | 0.119     |
| GO_ZINC_II_ION_TRANSPORT                                                                | 16   | -0.624           | 0.134     |
| GO_RRNA_METABOLIC_PROCESS                                                               | 222  | -0.398           | 0.165     |
| GO_NCRNA_PROCESSING                                                                     | 324  | -0.387           | 0.161     |
| GO_NEGATIVE_REGULATION_OF_ERK1_AND_ERK2_CASCADE                                         | 28   | -0.536           | 0.169     |
| GO_TRNA_TRANSPORT                                                                       | 31   | -0.522           | 0.177     |
| GO_NEGATIVE_REGULATION_OF_LEUKOCYTE_DIFFERENTIATION                                     | 31   | -0.521           | 0.178     |
| GO_NEGATIVE_REGULATION_OF_DNA_REPLICATION                                               | 39   | -0.499           | 0.177     |
| GO_AMINO_ACID_ACTIVATION                                                                | 43   | -0.493           | 0.173     |
| GO_NEGATIVE_REGULATION_OF_CELL_SUBSTRATE_ADHESION                                       | 27   | -0.534           | 0.172     |
| GO_AMINO_ACID_TRANSMEMBRANE_TRANSPORT                                                   | 21   | -0.569           | 0.175     |
| GO_NUCLEOBASE_CONTAINING_COMPOUND_TRANSPORT                                             | 153  | -0.406           | 0.174     |
| GO_NEGATIVE_REGULATION_OF_MITOCHONDRION_ORGANIZATION                                    | 26   | -0.544           | 0.171     |
| GO_RNA_MODIFICATION                                                                     | 79   | -0.443           | 0.183     |
| GO_INACTIVATION_OF_MAPK_ACTIVITY                                                        | 15   | -0.624           | 0.180     |
| GO_HEME_METABOLIC_PROCESS                                                               | 21   | -0.559           | 0.186     |
| GO_PEPTIDYL_ASPARAGINE_MODIFICATION                                                     | 28   | -0.527           | 0.188     |
| GO_PROTEIN_EXPORT_FROM_NUCLEUS                                                          | 24   | -0.541           | 0.191     |

|                                                                              |     |        |       |
|------------------------------------------------------------------------------|-----|--------|-------|
| GO_ER_ASSOCIATED_UBIQUITIN_DEPENDENT_PROTEIN_CATABOLIC_PROCESS               | 55  | -0.456 | 0.187 |
| GO_TRNA_MODIFICATION                                                         | 43  | -0.489 | 0.185 |
| GO_GLUCOSE_6_PHOSPHATE_METABOLIC_PROCESS                                     | 16  | -0.599 | 0.181 |
| GO_RESPONSE_TO_ANTIBIOTIC                                                    | 24  | -0.543 | 0.186 |
| GO_TRNA_METHYLATION                                                          | 19  | -0.585 | 0.183 |
| GO_POSITIVE_REGULATION_OF_INTERFERON_BETA_PRODUCTION                         | 16  | -0.596 | 0.182 |
| GO_DNA_REPLICATION_INITIATION                                                | 24  | -0.547 | 0.183 |
| GO_CELL_SURFACE_RECEPTOR_SIGNALING_PATHWAY_INVOLVED_IN_CELL_CELL_SIGNALING   | 15  | -0.610 | 0.184 |
| GO_PTERIDINE_CONTAINING_COMPOUND_METABOLIC_PROCESS                           | 25  | -0.537 | 0.186 |
| GO_REGULATION_OF_CELL_SUBSTRATE_ADHESION                                     | 89  | -0.424 | 0.184 |
| GO_ORGANIC_ACID_TRANSMEMBRANE_TRANSPORT                                      | 31  | -0.511 | 0.185 |
| GO_CARBOHYDRATE_BIOSYNTHETIC_PROCESS                                         | 71  | -0.437 | 0.182 |
| GO_VESICLE_COATING                                                           | 53  | -0.461 | 0.180 |
| GO_REGULATION_OF_RNA_STABILITY                                               | 110 | -0.408 | 0.179 |
| GO_CELLULAR_AMINO_ACID_BIOSYNTHETIC_PROCESS                                  | 56  | -0.447 | 0.189 |
| GO_REGULATION_OF_CELLULAR_PH                                                 | 34  | -0.493 | 0.187 |
| GO_PORPHYRIN_CONTAINING_COMPOUND_METABOLIC_PROCESS                           | 23  | -0.547 | 0.186 |
| GO_NUCLEAR_TRANSPORT                                                         | 258 | -0.374 | 0.185 |
| GO_PROTEIN_LOCALIZATION_TO_MITOCHONDRION                                     | 53  | -0.458 | 0.184 |
| GO_RIBOSOME_ASSEMBLY                                                         | 48  | -0.462 | 0.183 |
| GO_PYRIMIDINE_NUCLEOTIDE_METABOLIC_PROCESS                                   | 36  | -0.489 | 0.182 |
| GO_VITAMIN_METABOLIC_PROCESS                                                 | 58  | -0.448 | 0.180 |
| GO_CELLULAR_GLUCOSE_HOMEOSTASIS                                              | 37  | -0.480 | 0.180 |
| GO_PROTEIN_TARGETING_TO_MITOCHONDRION                                        | 41  | -0.472 | 0.179 |
| GO_RNA_LOCALIZATION                                                          | 151 | -0.391 | 0.177 |
| GO_REGULATION_OF_VIRAL_TRANSCRIPTION                                         | 45  | -0.461 | 0.176 |
| GO_ANION_TRANSMEMBRANE_TRANSPORT                                             | 70  | -0.433 | 0.186 |
| GO_VITAMIN_TRANSPORT                                                         | 15  | -0.599 | 0.186 |
| GO_REGULATION_OF_TELOMERE_MAINTENANCE                                        | 53  | -0.450 | 0.185 |
| GO_TRANSCRIPTION_FROM_RNA_POLYMERASE_III_PROMOTER                            | 33  | -0.492 | 0.193 |
| GO_TETRAPYRROLE_BIOSYNTHETIC_PROCESS                                         | 21  | -0.542 | 0.192 |
| GO_RIBOSOMAL_LARGE_SUBUNIT_BIOGENESIS                                        | 43  | -0.471 | 0.195 |
| GO_INNATE_IMMUNE_RESPONSE_ACTIVATING_CELL_SURFACE_RECEPTOR_SIGNALING_PATHWAY | 72  | -0.429 | 0.193 |
| GO_REGULATION_OF_TELOMERE_MAINTENANCE_VIA_TELOMERE_LENGTHENING               | 41  | -0.472 | 0.193 |
| GO_NEGATIVE_REGULATION_OF_CELLULAR_RESPONSE_TO_GROWTH_FACTOR_STIMULUS        | 59  | -0.444 | 0.192 |
| GO_DICARBOXYLIC_ACID_METABOLIC_PROCESS                                       | 56  | -0.444 | 0.197 |
| GO_DNA_DEPENDENT_DNA_REPLICATION                                             | 79  | -0.417 | 0.199 |
| GO_RRNA_MODIFICATION                                                         | 19  | -0.544 | 0.201 |
| GO_REGULATION_OF_ADHERENS_JUNCTION_ORGANIZATION                              | 33  | -0.490 | 0.200 |
| GO_NCRNA_TRANSCRIPTION                                                       | 72  | -0.418 | 0.209 |
| GO_RNA_METHYLATION                                                           | 39  | -0.472 | 0.210 |
| GO_ORGANOPHOSPHATE_BIOSYNTHETIC_PROCESS                                      | 278 | -0.361 | 0.213 |
| GO_REGULATION_OF_CELL_MATRIX_ADHESION                                        | 52  | -0.443 | 0.213 |
| GO_NEGATIVE_REGULATION_OF_CELL_MATRIX_ADHESION                               | 16  | -0.563 | 0.212 |
| GO_REGULATION_OF_PH                                                          | 38  | -0.475 | 0.212 |
| GO_MITOCHONDRIAL_TRANSPORT                                                   | 131 | -0.384 | 0.212 |
| GO_CARBOHYDRATE_DERIVATIVE_BIOSYNTHETIC_PROCESS                              | 338 | -0.354 | 0.212 |
| GO_MATURATION_OF_5_8S_RRNA                                                   | 24  | -0.524 | 0.212 |
| GO_CELLULAR_RESPONSE_TO_INTERFERON_GAMMA                                     | 31  | -0.482 | 0.212 |
| GO_MULTI_ORGANISM_LOCALIZATION                                               | 52  | -0.441 | 0.212 |

# Supplementary Material

|                                                |     |        |       |
|------------------------------------------------|-----|--------|-------|
| GO_SNRNA_METABOLIC_PROCESS                     | 69  | -0.423 | 0.212 |
| GO_DE_NOVO_PROTEIN_FOLDING                     | 16  | -0.563 | 0.220 |
| GO_NIK_NF_KAPPAB_SIGNALING                     | 62  | -0.427 | 0.220 |
| GO_RESPONSE_TO_ARSENIC_CONTAINING_SUBSTANCE    | 18  | -0.554 | 0.226 |
| GO_REGULATION_OF_TELOMERASE_ACTIVITY           | 31  | -0.486 | 0.226 |
| GO_PYRIMIDINE_NUCLEOTIDE_BIOSYNTHETIC_PROCESS  | 23  | -0.521 | 0.225 |
| GO_CELLULAR_AMINO_ACID_METABOLIC_PROCESS       | 193 | -0.367 | 0.223 |
| GO_REGULATION_OF_MRNA_SPLICING_VIA_SPLICEOSOME | 46  | -0.441 | 0.225 |
| GO_CELLULAR_RESPONSE_TO_KETONE                 | 36  | -0.468 | 0.231 |
| GO_CARBOHYDRATE_HOMEOSTASIS                    | 75  | -0.414 | 0.235 |
| GO_REGULATION_OF_MITOCHONDRION_ORGANIZATION    | 140 | -0.374 | 0.246 |
